# Supplementary material for: Gut Microbiota Characteristics of People with Obesity by Meta-Analysis of Existing Datasets
Source: Nutrients. 2022 Jul 21;14(14):2993. doi: 10.3390/nu14142993 (PMC9325184; doi:10.3390/nu14142993)
Supplement: Supplementary file 1 [file nutrients-14-02993-s001.zip]

Archive with 18 entries (16 files):
- Figure S1-11/
- Figure S1-11.pdf
- Figure S1-11/Figure S1.tif
- Figure S1-11/Figure S10.tif
- Figure S1-11/Figure S11.tif
- Figure S1-11/Figure S2.tif
- Figure S1-11/Figure S3.tif
- Figure S1-11/Figure S4.tif
- Figure S1-11/Figure S5.tif
- Figure S1-11/Figure S6.tif
- Figure S1-11/Figure S7.tif
- Figure S1-11/Figure S8.tif
- Figure S1-11/Figure S9.tif
- table S1-4/
- table S1-4/Table S1.xlsx
- table S1-4/Table S2.xlsx
- table S1-4/Table S3.xlsx
- table S1-4/Table S4.xlsx
