# Supplementary material for: Gut Microbiota Characteristics of People with Obesity by Meta-Analysis of Existing Datasets
Source: Nutrients. 2022 Jul 21;14(14):2993. doi: 10.3390/nu14142993 (PMC9325184; doi:10.3390/nu14142993)
Supplement: Supplementary file 1 [file nutrients-14-02993-s001.zip › table S1-4/Table S1.xlsx]

## Sheet: total_Obese_alpha_wilcoxtest
Table S1. The Wilcoxon test results of the alpha diversity metrics between the obesity and control groups.
Control median	Obesity median	pvalue	measures	study
413	365	1.34e-07	Observed	PRJEB11419
697.842	611.803	6.51e-07	Chao1	PRJEB11419
714.301	625.934	1.95e-06	ACE	PRJEB11419
3.62901	3.44921	0.000193139	Shannon	PRJEB11419
0.919539	0.906445	0.00507936	Simpson	PRJEB11419
0.605262	0.582484	0.00114593	J	PRJEB11419
304	302	0.381056	Observed	PRJEB25642
428.667	411.676	0.319587	Chao1	PRJEB25642
415.84	398.489	0.269696	ACE	PRJEB25642
3.57828	3.57317	0.695114	Shannon	PRJEB25642
0.928245	0.923842	0.889272	Simpson	PRJEB25642
0.63199	0.627957	0.992687	J	PRJEB25642
215	187.5	0.0493073	Observed	PRJNA417579
255.917	231.142	0.0249943	Chao1	PRJNA417579
259.25	235.265	0.038858	ACE	PRJNA417579
3.40583	3.36475	0.484416	Shannon	PRJNA417579
0.916793	0.919323	0.844782	Simpson	PRJNA417579
0.62932	0.634641	0.857311	J	PRJNA417579
199	179	0.34241	Observed	PRJNA434133
250	211.167	0.352977	Chao1	PRJNA434133
258.575	215.276	0.419163	ACE	PRJNA434133
3.14731	2.93915	0.191764	Shannon	PRJNA434133
0.896576	0.882225	0.347095	Simpson	PRJNA434133
0.600509	0.574143	0.237148	J	PRJNA434133
141	147.5	0.781797	Observed	PRJNA828327
181.606	180.301	0.445225	Chao1	PRJNA828327
182.036	183.554	0.471039	ACE	PRJNA828327
2.70372	2.85314	0.361492	Shannon	PRJNA828327
0.848249	0.875594	0.210063	Simpson	PRJNA828327
0.530544	0.564782	0.301487	J	PRJNA828327
190.5	178	0.182492	Observed	PRJNA290926
235.488	213.533	0.312571	Chao1	PRJNA290926
231.826	224.676	0.348341	ACE	PRJNA290926
3.64152	3.56786	0.39224	Shannon	PRJNA290926
0.943976	0.950591	0.648765	Simpson	PRJNA290926
0.676108	0.685107	0.67102	J	PRJNA290926
148	159	0.530575	Observed	PRJCA004023
217	206.452	0.816201	Chao1	PRJCA004023
204.54	206.269	0.70679	ACE	PRJCA004023
3.1093	3.15857	0.965719	Shannon	PRJCA004023
0.916668	0.906968	0.675077	Simpson	PRJCA004023
0.631041	0.621744	0.821465	J	PRJCA004023
228.5	255	0.019426	Observed	PRJNA417691
320.4	390.339	0.00289556	Chao1	PRJNA417691
317.109	382.662	0.00049756	ACE	PRJNA417691
3.36208	3.18937	0.164132	Shannon	PRJNA417691
0.92749	0.90622	0.0554734	Simpson	PRJNA417691
0.627794	0.581095	0.0100137	J	PRJNA417691
