# Supplementary material for: Gut Microbiota Characteristics of People with Obesity by Meta-Analysis of Existing Datasets
Source: Nutrients. 2022 Jul 21;14(14):2993. doi: 10.3390/nu14142993 (PMC9325184; doi:10.3390/nu14142993)
Supplement: Supplementary file 1 [file nutrients-14-02993-s001.zip › table S1-4/Table S2.xlsx]

## Sheet: total_Overweight_alpha_wilcoxte
Table S2. The Wilcoxon test results of the alpha diversity metrics between the overweight and control groups.
Control median	Overweight median	pvalue	measures	study
190.5	178	0.182492	Observed	PRJNA290926
235.488	213.533	0.312571	Chao1	PRJNA290926
231.826	224.676	0.348341	ACE	PRJNA290926
3.64152	3.56786	0.39224	Shannon	PRJNA290926
0.943976	0.950591	0.648765	Simpson	PRJNA290926
0.676108	0.685107	0.67102	J	PRJNA290926
304	302	0.381056	Observed	PRJEB25642
428.667	411.676	0.319587	Chao1	PRJEB25642
415.84	398.489	0.269696	ACE	PRJEB25642
3.57828	3.57317	0.695114	Shannon	PRJEB25642
0.928245	0.923842	0.889272	Simpson	PRJEB25642
0.63199	0.627957	0.992687	J	PRJEB25642
215	187.5	0.0493073	Observed	PRJNA417579
255.917	231.142	0.0249943	Chao1	PRJNA417579
259.25	235.265	0.038858	ACE	PRJNA417579
3.40583	3.36475	0.484416	Shannon	PRJNA417579
0.916793	0.919323	0.844782	Simpson	PRJNA417579
0.62932	0.634641	0.857311	J	PRJNA417579
413	365	1.34e-07	Observed	PRJEB11419
697.842	611.803	6.51e-07	Chao1	PRJEB11419
714.301	625.934	1.95e-06	ACE	PRJEB11419
3.62901	3.44921	0.000193139	Shannon	PRJEB11419
0.919539	0.906445	0.00507936	Simpson	PRJEB11419
0.605262	0.582484	0.00114593	J	PRJEB11419
141	147.5	0.781797	Observed	PRJNA828327
181.606	180.301	0.445225	Chao1	PRJNA828327
182.036	183.554	0.471039	ACE	PRJNA828327
2.70372	2.85314	0.361492	Shannon	PRJNA828327
0.848249	0.875594	0.210063	Simpson	PRJNA828327
0.530544	0.564782	0.301487	J	PRJNA828327
