# Supplementary material for: Gut Microbiota Characteristics of People with Obesity by Meta-Analysis of Existing Datasets
Source: Nutrients. 2022 Jul 21;14(14):2993. doi: 10.3390/nu14142993 (PMC9325184; doi:10.3390/nu14142993)
Supplement: Supplementary file 1 [file nutrients-14-02993-s001.zip › table S1-4/Table S3.xlsx]

## Sheet: Study_adonis_result_Obese
Table S3. The PERMANOVA results of the Bray-Curtis distances between the obesity and control groups.
Study	Fstat	R2	Pvalue	Group
PRJNA290926	1.17795	0.0154631	0.2181	Obesity
PRJEB25642	1.59633	0.00244987	0.0438	Obesity
PRJNA417579	1.00535	0.00948398	0.4229	Obesity
PRJNA434133	1.22406	0.00932804	0.2206	Obesity
PRJNA417691	3.61101	0.0699659	0.0007	Obesity
PRJEB11419	3.38711	0.00174738	0.0009	Obesity
PRJCA004023	0.656923	0.00904144	0.9008	Obesity
PRJNA828327	2.50895	0.0249625	0.0166	Obesity
