# Supplementary material for: Gut Microbiota Characteristics of People with Obesity by Meta-Analysis of Existing Datasets
Source: Nutrients. 2022 Jul 21;14(14):2993. doi: 10.3390/nu14142993 (PMC9325184; doi:10.3390/nu14142993)
Supplement: Supplementary file 1 [file nutrients-14-02993-s001.zip › table S1-4/Table S4.xlsx]

## Sheet: Study_adonis_result_Overweight
Table S4. The PERMANOVA results of the Bray-Curtis distances between the overweight and control groups.
Study	Fstat	R2	Pvalue	Group
PRJNA290926	1.128	0.012	0.267	Overweight
PRJEB25642	2.406	0.005	0.002	Overweight
PRJNA417579	1.147	0.008	0.266	Overweight
PRJEB11419	2.819	0.001	0.003	Overweight
PRJNA828327	1.113	0.01	0.277	Overweight
